# Supplementary material for: One-pot synthesis of vanadium-containing silica SBA-3 materials and their catalytic activity for propene oxidation
Source: Royal Society of Chemistry journal article supplement (doi:10.1039/c8ra10171j), 2019-01-01
Supplement: c8ra10171j1.pdf [file c8ra10171j1.pdf]

## Supporting Information

### One-pot synthesis of vanadium-containing silica SBA-3 materials and their catalytic activity for propene oxidation

Ewa Janiszewska,\* Agnieszka Held,\* Krystyna Nowińska and Stanisław Kowalak

*Adam Mickiewicz University, Faculty of Chemistry, Umultowska 89b, 61614 Poznan, Poland*

**Keywords:** vanadium bearing SBA-3, direct synthesis, propene, epoxidation, acidity

*\*Author to whom correspondence should be addressed*

*E-mail: [eszym@amu.edu.pl](mailto:eszym@amu.edu.pl) (E. Janiszewska), [awaclaw@amu.edu.pl](mailto:awaclaw@amu.edu.pl) (A. Held)*

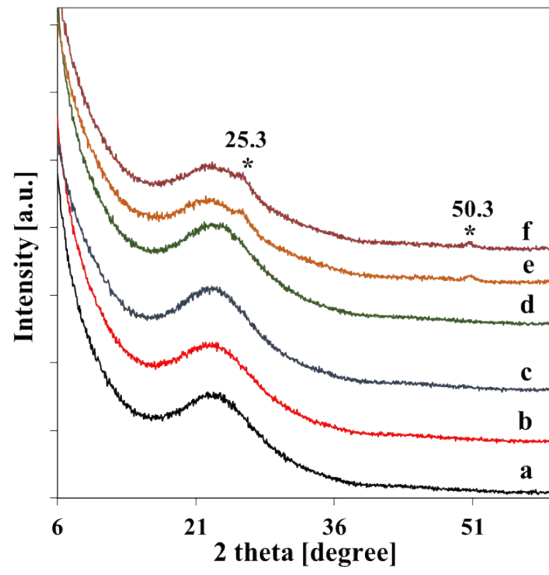

**Fig. S1** XRD patterns of calcined samples: (a)  $V_{s1}$ -SBA-3, (b)  $V_{s2}$ -SBA-3, (c)  $V_{s3}$ -SBA-3, (d)  $V_{m1}$ -SBA-3, (e)  $V_{m2}$ -SBA-3, (f)  $V_{m3}$ -SBA-3.

**Table 1S** Results of the UV-vis spectra data for V-SBA-3 samples.

| Sample                 | pH  | V content [%] | Distribution of V-nanospecies |       |         |       |         |       |         |       |
|------------------------|-----|---------------|-------------------------------|-------|---------|-------|---------|-------|---------|-------|
|                        |     |               | ~250 nm                       |       | ~280 nm |       | ~320 nm |       | ~400 nm |       |
|                        |     |               | area %                        | wt. % | area %  | wt. % | area %  | wt. % | area %  | wt. % |
| Vs <sub>1</sub> -SBA-3 | <1  | 0.48          | 60.5                          | 0.29  | 35.9    | 0.17  | 2.5     | 0.01  | 1.1     | <0.01 |
| Vs <sub>2</sub> -SBA-3 | 2.2 | 0.54          | 62.3                          | 0.34  | 32.5    | 0.17  | 3.4     | 0.02  | 1.8     | 0.01  |
| Vs <sub>3</sub> -SBA-3 | 3.1 | 0.49          | 61.3                          | 0.30  | 32.7    | 0.16  | 2.8     | 0.01  | 3.2     | 0.02  |
| Vm <sub>1</sub> -SBA-3 | <1  | 0.26          | 63.8                          | 0.17  | 29.0    | 0.07  | 4.3     | 0.01  | 2.9     | <0.01 |
| Vm <sub>2</sub> -SBA-3 | 2.2 | 5.27          | 30.2                          | 1.59  | 45.3    | 2.39  | 10.8    | 0.57  | 13.7    | 0.72  |
| Vm <sub>3</sub> -SBA-3 | 3.1 | 5.97          | 31.1                          | 1.86  | 29.2    | 1.74  | 12.6    | 0.75  | 27.1    | 1.62  |

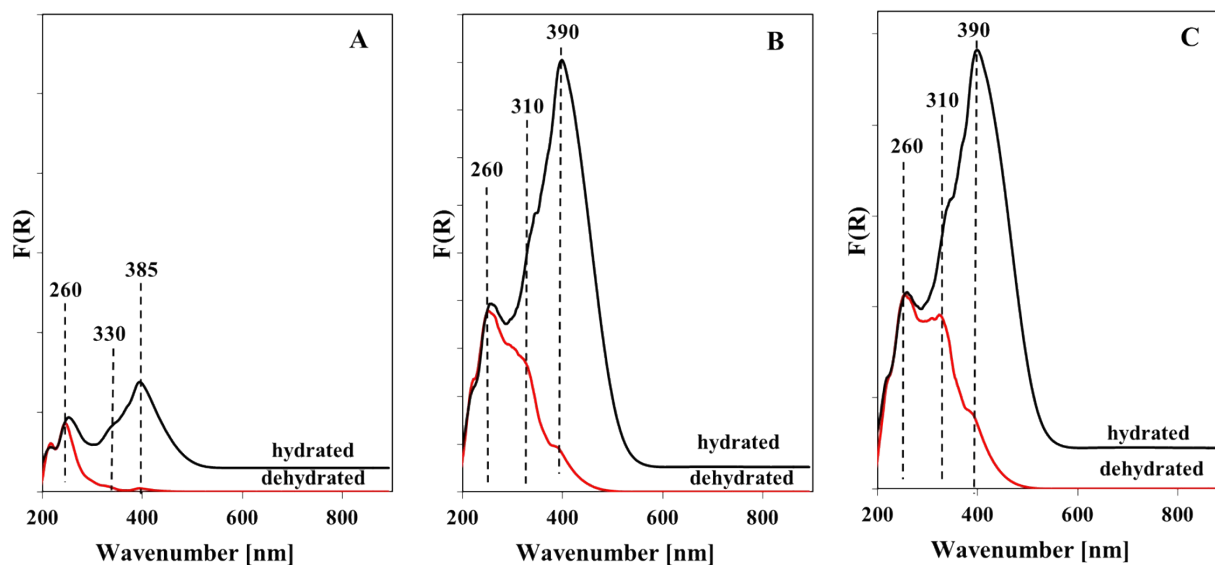

**Fig. S2** UV-vis spectra of hydrated and dehydrated samples: V<sub>m1</sub>-SBA-3 (A), V<sub>m2</sub>-SBA-3 (B), V<sub>m3</sub>-SBA-3 (C).

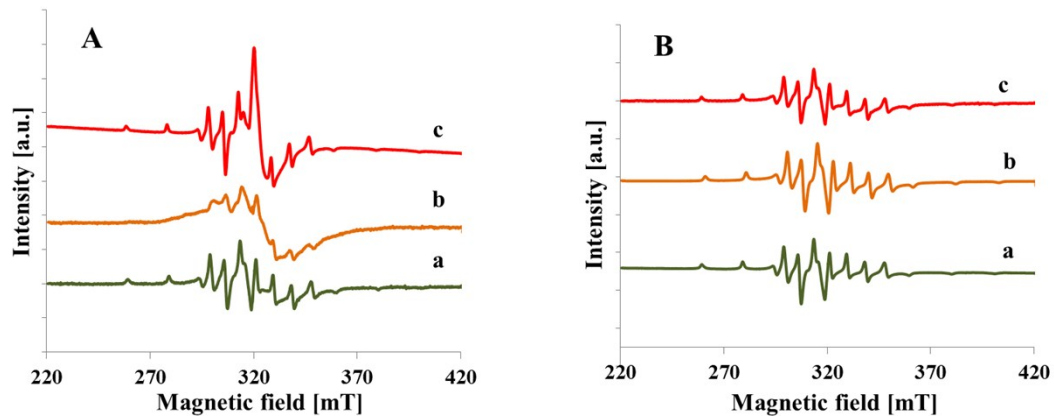

**Fig. S3** ESR spectra of as synthesized (A) and calcined (B) samples: (a)  $V_{m1}$ -SBA-3, (b)  $V_{m2}$ -SBA-3, (c)  $V_{s2}$ -SBA-3.

**Table 2S** EPR parameters of vanadium species in indicated samples.

| Sample           | $g_{\parallel}$ | $A_{\parallel}$<br>[Gs] | $g_{\perp}$ | $A_{\perp}$<br>[Gs] | $g_{iso}$ |
|------------------|-----------------|-------------------------|-------------|---------------------|-----------|
| $V_{m1}$ -SBA-3A | 1.928           | 202                     | 1.981       | 77                  | 1.963     |
| $V_{m1}$ -SBA-3  | 1.929           | 203                     | 1.980       | 77                  | 1.963     |
| $V_{m2}$ -SBA-3A | not resolved    | -                       | -           | -                   | 1.960     |
| $V_{m2}$ -SBA-3  | 1.918           | 203                     | 1.970       | 77                  | 1.953     |
| $V_{s2}$ -SBA-3A | 1.934           | 201                     | 1.984       | 76                  | 1.967     |
| $V_{s2}$ -SBA-3  | 1.929           | 202                     | 1.980       | 78                  | 1.963     |

A- samples as-synthesized
